# Supplementary material for: Differential Expression Analysis of Blood MicroRNA in Identifying Potential Genes Relevant to Alzheimer’s Disease Pathogenesis, Using an Integrated Bioinformatics and Machine Learning Approach
Source: MDPI journal article supplement (doi:10.3390/app13053071), 2023-02-27
Supplement: s1 [file s1]

Archive with 1 entries (1 files):
- applsci-2236083-supplementary.pdf
