# Supplementary material for: Differential Expression Analysis of Blood MicroRNA in Identifying Potential Genes Relevant to Alzheimer’s Disease Pathogenesis, Using an Integrated Bioinformatics and Machine Learning Approach
Source: MDPI journal article supplement (doi:10.3390/app13053071), 2023-02-27
Supplement: s1 [file s1 › applsci-2236083-supplementary.pdf]

## Supporting method

Table S1: Inclusion and exclusion criteria of selecting AD patients and normal controls.

|                 | Inclusion criteria                                                           | Exclusion criteria                                                                                                                                                                                                                                |
|-----------------|------------------------------------------------------------------------------|---------------------------------------------------------------------------------------------------------------------------------------------------------------------------------------------------------------------------------------------------|
| AD patients     | Malaysia citizen                                                             | Patients under palliative care for other diseases                                                                                                                                                                                                 |
|                 | 65 years old and above                                                       | Diagnosed with vascular dementia; Lewy Body dementia; Parkinson's disease dementia; Frontotemporal dementia; Creutzfeldt-Jakob disease; Wernicke-Korsakoff syndrome; Normal pressure hydrocephalus; Huntington's disease; Down-syndrome dementia. |
|                 | Symptoms of memory deterioration worsened with time                          |                                                                                                                                                                                                                                                   |
|                 | Symptoms of losing the ability to perform daily function                     |                                                                                                                                                                                                                                                   |
|                 | Diagnosed with AD for more than 2 months                                     |                                                                                                                                                                                                                                                   |
|                 | Mini-Mental State Examination (MMSE) $\leq 24$                               |                                                                                                                                                                                                                                                   |
| Normal controls | Malaysia citizen                                                             | Patients under palliative care for other diseases                                                                                                                                                                                                 |
|                 | 65 years old and above                                                       | Diagnosed with AD/ any other type of dementia                                                                                                                                                                                                     |
|                 | Does not show symptoms of memory deterioration which have worsened with time | Diagnosed with a known significant (in the view of the investigator) concurrent medical disease                                                                                                                                                   |
|                 | Does not show symptoms of losing the ability to perform daily function       |                                                                                                                                                                                                                                                   |
|                 | Mini-Mental State Examination (MMSE) $\geq 25$                               |                                                                                                                                                                                                                                                   |

Table S2: Subject details and their corresponding ID used in this study.

| Sample ID | Patient/<br>Control | Gender | Age* | Ethnicity | Cognitive<br>score |
|-----------|---------------------|--------|------|-----------|--------------------|
| AD1       | Patient             | Male   | 84   | Malay     | $\leq 24$          |
| AD2       | Patient             | Male   | 75   | Malay     | $\leq 24$          |
| AD3       | Patient             | Female | 75   | Chinese   | $\leq 24$          |
| AD4       | Patient             | Female | 74   | Chinese   | $\leq 24$          |
| AD5       | Patient             | Female | 75   | Chinese   | $\leq 24$          |
| AD6       | Patient             | Male   | 70   | Chinese   | $\leq 24$          |
| AD7       | Patient             | Male   | 75   | Chinese   | $\leq 24$          |
| AD8       | Patient             | Female | 86   | Malay     | $\leq 24$          |
| Ctrl1     | Control             | Female | 78   | Malay     | $\geq 25$          |
| Ctrl2     | Control             | Male   | 74   | Malay     | $\geq 25$          |
| Ctrl3     | Control             | Male   | 73   | Chinese   | $\geq 25$          |
| Ctrl4     | Control             | Female | 84   | Chinese   | $\geq 25$          |

Noted: \*Age of subjects at the year of recruitment.

### Sample preparation

1. Prepare 750µl RiboEx™ LS in a 1.5ml microcentrifuge tube.
2. Add 250µl blood sample to the 1.5ml microcentrifuge tube and vortex vigorously.
3. Incubate 2min at room temperature to allow leukocytes to completely be collapsed.
4. Add 0.2ml of chloroform. Shake vigorously for 15sec and let it stand for 2min at room temperature.
5. Centrifuge at 12,000 x g for 15min at 4°C. The mixture will be separated into three phases; a lower layer, an interphase, and a colorless upper aqueous layer. The upper aqueous volume is about 450µl.
6. Transfer the aqueous phase (approximately 450ul) to a EzPure™ filter. Small amount of DNA and other blood contaminants are eliminated by EzPure™ filter.
7. Centrifuge at  $\geq 10,000 \times g$  for 30sec at room temperature.
8. Add 2 volume (~900µl) of buffer RB1 to the collection tube including passed-through and mix well by pipetting.
9. Transfer up to 700µl of the mixture to a mini spin column.
10. Centrifuge at  $\geq 10,000 \times g$  for 30sec at room temperature. Discard the passed-through and reinsert the mini spin column back into the same tube.
11. Repeat step 9 ~ 10 using the remainder of the sample.
12. Add 500µl of buffer RBW to the mini spin column.
13. Centrifuge at  $\geq 10,000 \times g$  for 30sec at room temperature. Discard the passed-through and reinsert the mini spin column back into the same tube.
14. Add 500µl of buffer RNW to the mini spin column.
15. Centrifuge at  $\geq 10,000 \times g$  for 30sec at room temperature. Discard the passed-through and reinsert the mini spin column back into the same tube.
16. Centrifuge at  $\geq 10,000 \times g$  for an additional 1min at room temperature to remove residual wash buffer. Transfer the mini spin column to a new 1.5ml microcentrifuge tube.
17. Add 30µl of RNase-free water to the center of the membrane in the mini spin column and incubate for 3 min.
18. Centrifuge at  $\geq 10,000 \times g$  for 1min at room temperature.
19. Measure quantity and purity using Nanodrop.

### Kits information

- 1) RNA extraction kit: GeneAll HybridRT™ Blood RNA Kit (Catalogue No. 305-101)
- 2) Library prep kit: NEXTflex Illumina Small RNA Sequencing Kit v3 (Catalogue No. NOVA-5132-06)
